# Supplementary material for: Removal of reactive brilliant red X-3B by a weak magnetic field enhanced Fenton-like system with zero-valent iron
Source: Royal Society of Chemistry journal article supplement (doi:10.1039/d0ra03480k), 2020-01-01
Supplement: d0ra03480k1.pdf [file d0ra03480k1.pdf]

## **Removal of Reactive Brilliant Red X-3B by Weak Magnetic Field enhanced Fenton-like system with zero-valent iron**

Liping Liang,<sup>ab</sup> Yuting Zhang,<sup>a</sup> Liubiao Cheng,<sup>a</sup> Qian Wu,<sup>a</sup> Yuanyuan Xue,<sup>a</sup> Qian Wang<sup>a</sup> and Xu Meng<sup>\*cd</sup>

<sup>a</sup> School of Civil Engineering, Shaoxing University, Shaoxing 312000, P. R. China

<sup>b</sup> College of Life Science, Shaoxing University, Shaoxing 312000, P. R. China

<sup>c</sup> College of Textile and Garment, Shaoxing University, Shaoxing 312000, P. R. China

<sup>d</sup> Key Laboratory of Clean Dyeing and Finishing Technology of Zhejiang Province, Shaoxing University, Shaoxing, 312000, P. R. China

*\*Corresponding author: Xu Meng*

## Supporting Information

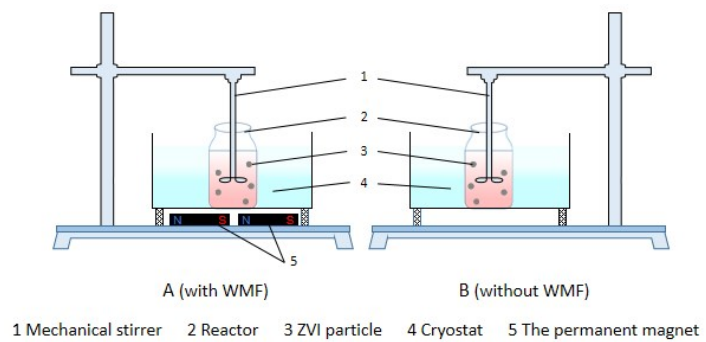

Fig. S1 A laboratory-scale experimental setup used in this experiment

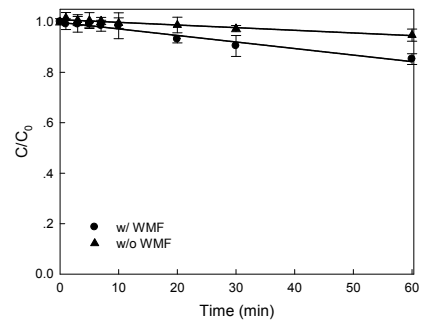

Fig. S2 The effect of WMF on the removal of X-3B by ZVI in the absence of  $H_2O_2$  (pH 4.0,  $50 \text{ mg L}^{-1}$  X-3B,  $0.5 \text{ g L}^{-1}$   $Fe^0$ , and  $T = 25 \text{ }^\circ\text{C}$ )

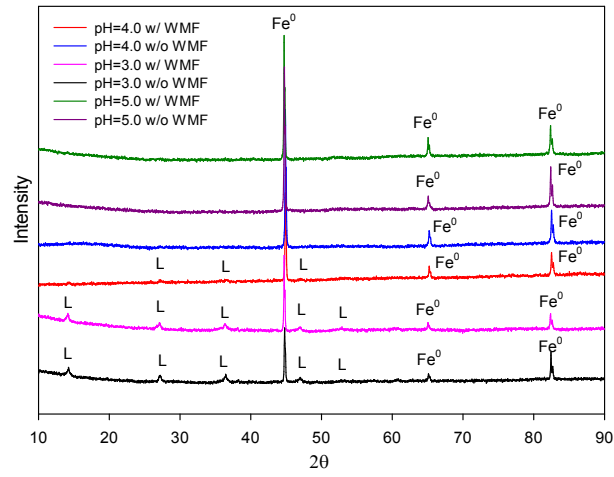

Fig. S3 XRD map of ZVI removal of X-3B under different pH (8 mM  $\text{H}_2\text{O}_2$ , 50 mg  $\text{L}^{-1}$  X-3B, 0.5 g  $\text{L}^{-1}$   $\text{Fe}^0$ , and  $T = 25^\circ\text{C}$ )

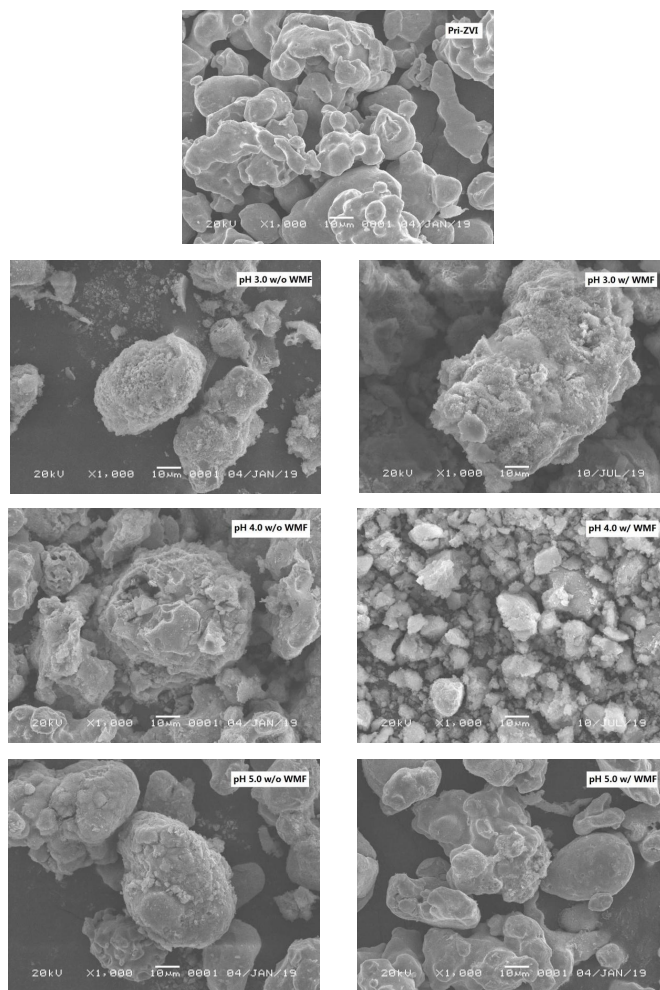

Fig. S4 SEM diagram for removal of X-3B by ZVI under different pH (8 mM  $H_2O_2$ , 50 mg  $L^{-1}$  X-3B, 0.5 g  $L^{-1}$   $Fe^0$ , and  $T = 25\text{ }^\circ C$ )

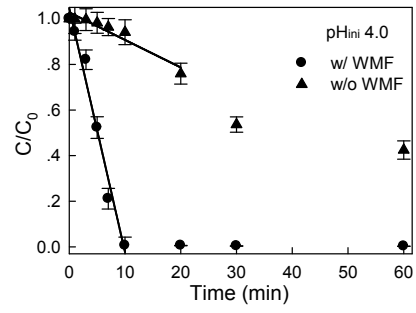

Fig. S5 Effect of WMF on ZVI/H<sub>2</sub>O<sub>2</sub> removal of X-3B at pH 4.0 (8 mM H<sub>2</sub>O<sub>2</sub>, 50 mg L<sup>-1</sup> X-3B, 0.5 g L<sup>-1</sup> Fe<sup>0</sup>, and T = 25 °C)

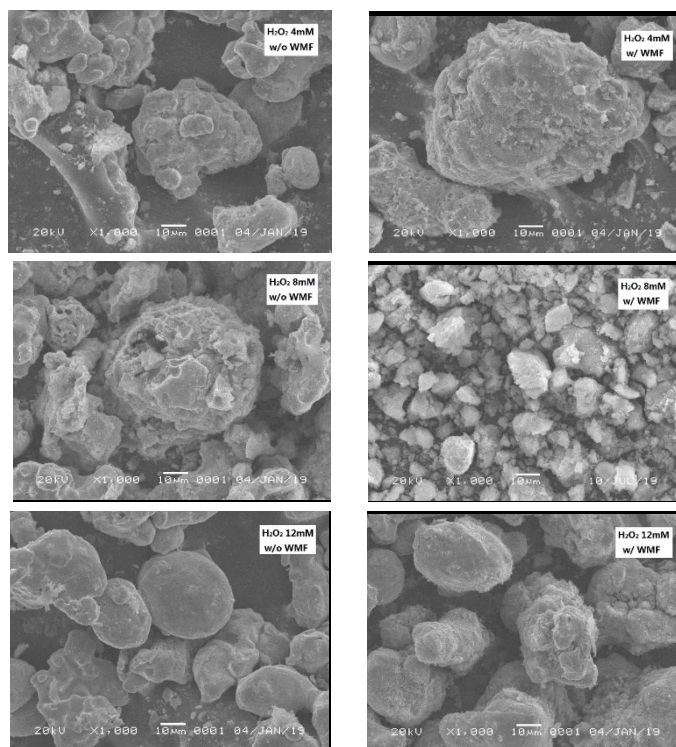

Fig. S6 SEM diagram for removal of X-3B by ZVI under different H<sub>2</sub>O<sub>2</sub> concentrations (pH 4.0, 50 mg L<sup>-1</sup> X-3B, 0.5 g L<sup>-1</sup> Fe<sup>0</sup>, and T = 25 °C)
